# Supplementary material
Source: PubMed Central journal article supplement (PMC4235596)
Supplement: Supp_Figure1.pdf [file Supp_Figure1.pdf]

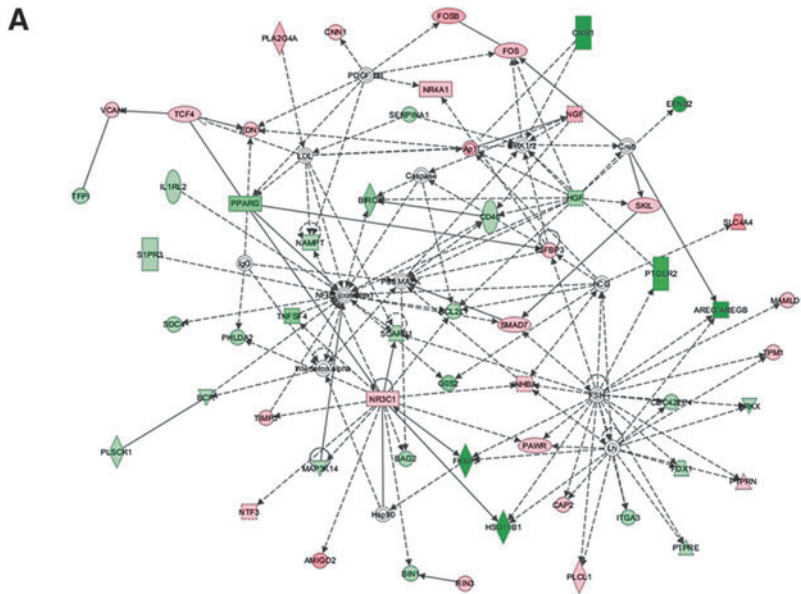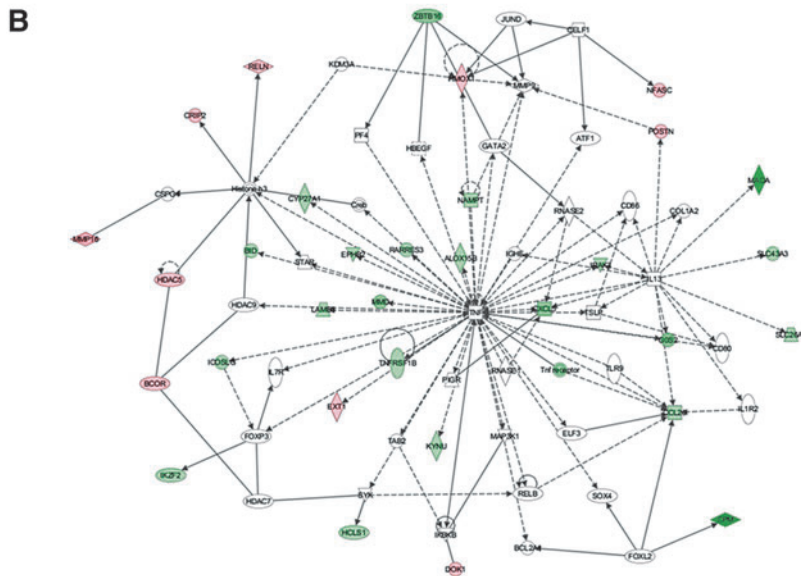

**C**

|          | Symbol            | Entrez Gene Name                                         | Fold Change | Location            | Type(s)                    |
|----------|-------------------|----------------------------------------------------------|-------------|---------------------|----------------------------|
| Network1 | <i>cnr1</i>       | cannabinoid receptor 1 (brain)                           | -31,627     | Plasma Membrane     | G-protein coupled receptor |
|          | <i>areg/aregb</i> | amphiregulin                                             | -31,481     | Extracellular Space | growth factor              |
|          | <i>efnb2</i>      | ephrin-B2                                                | -26,049     | Plasma Membrane     | other                      |
|          | <i>fkbp5</i>      | FK506 binding protein 5                                  | -19,747     | Nucleus             | enzyme                     |
|          | <i>hsd11b1</i>    | hydroxysteroid (11-beta) dehydrogenase 1                 | -19,149     | Cytoplasm           | enzyme                     |
|          | <i>ptger2</i>     | prostaglandin E receptor 2 (subtype EP2), 53kDa          | -15,357     | Plasma Membrane     | G-protein coupled receptor |
|          | <i>hgf</i>        | hepatocyte growth factor (hepapoietin A; scatter factor) | -5,638      | Extracellular Space | growth factor              |
| Network2 | <i>cpm</i>        | carboxypeptidase M                                       | -21,249     | Plasma Membrane     | peptidase                  |
|          | <i>maoa</i>       | monoamine oxidase A                                      | -16,804     | Cytoplasm           | enzyme                     |
|          | <i>zbtb16</i>     | zinc finger and BTB domain containing 16                 | -6,652      | Nucleus             | transcription regulator    |
|          | <i>alox15b</i>    | arachidonate 15-lipoxygenase, type B                     | -4,850      | Cytoplasm           | enzyme                     |
|          | <i>cc120</i>      | chemokine (C-C motif) ligand 20                          | -3,985      | Extracellular Space | cytokine                   |

**SUPPLEMENTARY FIG. S1.** Possible biological processes involving the differentially expressed genes. Gene expression in FP-ASCs and hASCs was analyzed using the Human Gene 1.0 ST array (Affymetrix) and subjected to an Ingenuity Knowledge Base search using the IPA application. Molecular interaction networks detected were (A) “Cell Growth and Proliferation, Cell Morphology and Cell Death” Network 1, score = 82. (B) “Cell Movement, Cell Signaling and Cell–Cell Interaction, and Cell Development” Network 2, score = 34. Indicative graphs showing genes differentially expressed in FP-ASCs and hASCs, shown in *green* (FP-ASCs > MSCs) or *red* (FP-ASCs < MSCs). Color intensity reflects the fold change (FC) in expression. *Uncolored symbols* connect genes excluded from the list of selected genes. (C) Table of array results showing expression levels for genes selected for validation by real-time polymerase chain reaction (RT-PCR) in the different networks. hASCs, human adipose-tissue-derived MSCs; FP-ASCs, fast-proliferating phenotype; MSCs, mesenchymal stromal cells; IPA, Ingenuity Pathway Analysis.
