# Supplementary material
Source: PubMed Central journal article supplement (PMC4235596)
Supplement: Supp_Figure2.pdf [file Supp_Figure2.pdf]

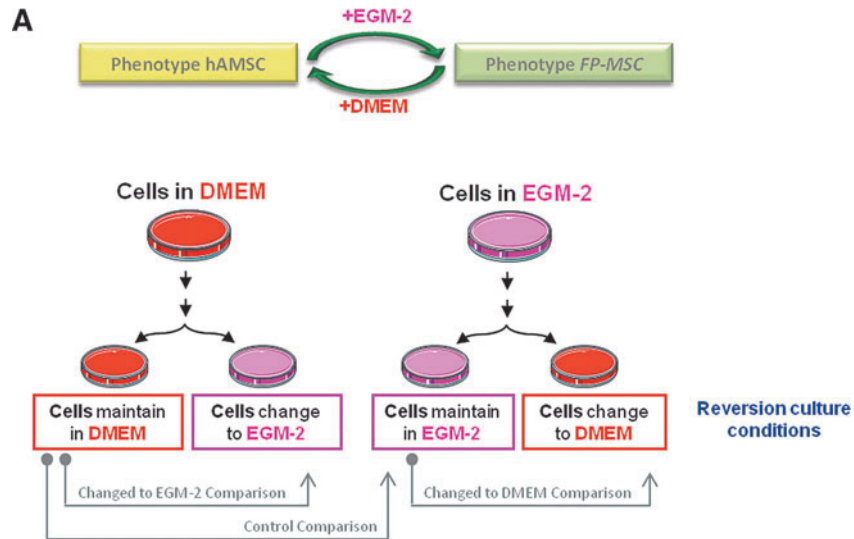

**B**

|                | CELL POPULATION        |                         |         |                        |         | CLONES                 |                        |         |                      |         |
|----------------|------------------------|-------------------------|---------|------------------------|---------|------------------------|------------------------|---------|----------------------|---------|
|                | Control (no reversion) | hAMSCs changed to EGM-2 |         | FP-MSCs change to DMEM |         | Control (no reversion) | M27-D changed to EGM-2 |         | M27-E change to DMEM |         |
|                |                        | 1 week                  | 2 weeks | 1 week                 | 2 weeks |                        | 1 week                 | 2 weeks | 1 week               | 2 weeks |
| <i>alox15b</i> | 110.62                 | 273.32                  | 480.37  | -17.10                 | -19.32  | 837.43                 | 2251.3                 | 757.8   | 239.2                | 63.8    |
| <i>areg</i>    | 11.24                  | 15.35                   | 9.77    | -16.21                 | -5.91   | 10.03                  | 83.3                   | 7.4     | 4.8                  | 6.3     |
| <i>cc120</i>   | 1.79                   | 51.10                   | 40.18   | 2.00                   | 1.25    | 54.05                  | 69.4                   | 158.2   | 13.1                 | 21.0    |
| <i>cnr1</i>    | 17.76                  | 6.88                    | 3.36    | -5.59                  | -5.41   | 0.88                   | 1.3                    | 0.3     | 1.0                  | 0.7     |
| <i>cpm</i>     | 7.90                   | 7.80                    | 10.26   | -1.60                  | -1.64   | 138.88                 | 204.9                  | 45.8    | 6.3                  | 4.3     |
| <i>efnb2</i>   | 4.02                   | 4.36                    | 2.32    | -2.06                  | -2.01   | 167.09                 | 103.6                  | 12.1    | 20.7                 | 7.1     |
| <i>fkbp5</i>   | 5.35                   | 4.20                    | 4.46    | -14.72                 | -12.15  | 26.01                  | 48.6                   | 17.0    | 10.8                 | 12.6    |
| <i>hgf</i>     | 3.10                   | 1.28                    | 2.23    | -2.71                  | -3.11   | 0.93                   | 1.7                    | 0.0     | 6.2                  | 1.0     |
| <i>hsd11b1</i> | 16.11                  | 26.43                   | 81.51   | 1.05                   | 1.27    | 40.92                  | 61.1                   | 11.1    | 10.6                 | 5.3     |
| <i>maoa</i>    | 12.11                  | 1.97                    | 4.72    | -2.23                  | -2.82   | 28.80                  | 17.5                   | 24.1    | 4.6                  | 0.5     |
| <i>ptger2</i>  | 14.20                  | 5.93                    | 15.70   | -5.08                  | -3.09   | 8.39                   | 10.4                   | 5.4     | 7.9                  | 7.2     |
| <i>zbtb16</i>  | 66.37                  | 2593.13                 | 881.02  | -5.65                  | -5.91   | 4057.64                | 7984.4                 | 4593.8  | 452.4                | 61.9    |

**SUPPLEMENTARY FIG. S2.** FP-ASC phenotype reversibility. **(A)** The diagram illustrates the procedure used to analyze phenotype reversibility. **(B)** Fold change values obtained from comparing gene expression in FP-ASC and hASC types subjected to changes in induction medium, as described in **(A)**.
