# Supplementary material
Source: PubMed Central journal article supplement (PMC4235596)
Supplement: Supp_Table1.pdf [file Supp_Table1.pdf]

## Supplementary Data

SUPPLEMENTARY TABLE S1. CELL SURFACE MARKER EXPRESSION IN hASCs AND FP-ASCs

|                         |                |         | <i>FP-MSCs</i> |                    |                   |
|-------------------------|----------------|---------|----------------|--------------------|-------------------|
|                         |                |         | <i>hASCs</i>   | <i>Early (p.3)</i> | <i>Late (p.7)</i> |
| Mesenchymal cell marker | Adipose marker | CD49d   | 25.4±2.9       | 57.6±3.6           | 61.2±3.5          |
|                         |                | CD54    | 48.2±15.5      | 21.3±2.0           | 17.0±1.9          |
|                         | General marker | CD34    | 0.0±0.0        | 0.0±0.0            | 0.0±0.0           |
|                         |                | CD13    | 99.9±0.1       | 90.5±0.8           | 90.9±0.6          |
|                         |                | CD29    | 12.5±6.5       | 4.6±1.0            | 12.2±10.6         |
|                         |                | CD44    | 99.9±0.0       | 92.5±0.8           | 93.6±1.1          |
|                         |                | CD90    | 98.1±0.6       | 77.7±1.9           | 73.2±2.0          |
|                         |                | CD105   | 99.3±0.3       | 66.7±3.3           | 48.2±17.0         |
|                         |                | CD73    | 99.6±0.1       | 72.8±3.1           | 77.5±3.3          |
|                         |                | CD106   | 0.0±0.0        | 11.9±5.1           | 20.2±8.6          |
| Endothelial marker      | CD144          | 0.0±0.0 | 0.0±0.0        | 0.0±0.0            |                   |
|                         | CD31           | 0.0±0.0 | 0.1±0.0        | 0.0±0.0            |                   |
|                         | VEGFR2         | 8.8±3.2 | 0.1±0.0        | 0.0±0.0            |                   |
|                         | CD133          | 0.0±0.0 | 4.2±0.4        | 2.7±2.3            |                   |
| Stem cell marker        | c-kit          | 0.8±0.7 | 0.0±0.0        | 0.0±0.0            |                   |

hASCs, human adipose-tissue-derived MSCs; FP-ASCs, fast-proliferating phenotype.
